# Supplementary material for: Cation only conduction in new polymer–SiO2 nanohybrids: Na+ electrolytes
Source: Royal Society of Chemistry journal article supplement (doi:10.1039/c3ta11290j), 2013-01-01
Supplement: c3ta11290j.pdf [file c3ta11290j.pdf]

Supporting Information:

Cation only Conduction in New Polymer/SiO<sub>2</sub> Nano Hybrids: Na<sup>+</sup> Electrolytes

Irune Villaluenga,<sup>a,b,c</sup> Xavier Bogle,<sup>d</sup> Steve Greenbaum,<sup>d</sup> Izaskun Gil de Muro,<sup>a</sup> Teófilo Rojo<sup>a, b</sup> and Michel Armand<sup>\*b</sup>

<sup>a</sup>CIC ENERGIGUNE, Albert Einstein 48, Miñano, Spain.

<sup>b</sup>Departamento de Química Inorgánica, Universidad del País Vasco UPV/EHU, Bilbao 48080, Spain.

<sup>c</sup>Current address: Environmental Energy Technologies Division, Lawrence Berkeley National Laboratory, Berkeley, CA 94720, USA and Department of Chemical and Biomolecular Engineering, University of California, Berkeley, CA 94720, USA.

<sup>d</sup>Department of Physics & Astronomy, Hunter College of the City University of New York, New York, NY 10065, USA.

E-mail: marmand@cicenergigune.com

Telephone: (+34) 945 297 108

Fax: (+34) 944 035 699

### General Information:

Methylene dichloride and triethylamine were transferred *via* needle and syringe under inert atmosphere (argon). Chemical shifts are given in  $\delta$ -scale as parts per million (ppm). <sup>13</sup>C and <sup>19</sup>F NMR spectra were measured on a Bruker Avance II 300 NMR spectrometer and a Bruker Avance III 400 (with CP-MAS) NMR spectrometer. The organic content was measured by analysis thermogravimetric (Netzsch STA 449C Instrument) under argon at a linear heating rate of 10°C/min from 25 °C to 800 °C. The size of hybrid nanoparticles was evaluated by transmission electronic microscopy (TEM Philips CM200) and light scattering (Malvern Zetasizer 4 spectrometer). Finally, the <sup>23</sup>Na Linewidth data was performed using a Chemagnetics static broadband probe with 1M NaCl in water as a reference set to 0 ppm. A single pulse sequence used with a  $\pi/4$  pulse width of 2  $\mu$ s (this maximizes the signal for a second-order quadrupole broadened spin-3/2 nucleus). The delay time was 0.5 second and 10000 scans were averaged. For the <sup>19</sup>F measurements a standard pulsed field gradient spin-echo sequence with rf pulse and gradient pulse spacing of 10 ms, gradient duration of 5 ms, and gradient strength of 1000G/cm.

### Synthesis of nanoparticles grafted with the anion of sodium 2-[(Trifluoromethane-sulfonylimido)-N-4-sulfonylphenyl]-ethyl trimethoxysilane (SiO<sub>2</sub>-anion).

2-(4-Chlorosulfonylphenyl) ethyltrimethoxysilane (organosilane 1, 2 g, Fluorochem<sup>®</sup>) was added under argon to a solution of trifluoromethanesulfonamide (1 g) and triethylamine (3.38 g, Aldrich) into 30 mL of methylene dichloride. The reaction mixture was stirred and heated at 40°C overnight. An orange-brown-colored wax (organosilane 2) was obtained after distillation of the solvent<sup>1</sup>. On the other hand, an alkaline stabilized dispersion of commercial silica nanoparticles (LUDOX SM-30, Aldrich) was diluted to 4 wt% particle fraction by addition of aqueous sodium hydroxide solution to pH ~11. Triethylammonium 2-[(Trifluoromethane-sulfonylimido)-N-4-sulfonylphenyl]ethyl trimethoxysilane (organosilane 2) at a ratio of 1.5 g per 1.0 g commercial SiO<sub>2</sub> nanoparticles was added dropwise at 100°C. Following the reaction solution was heated for 12 hours at 100°C. After 24 hours, an excess of Na<sub>2</sub>CO<sub>3</sub> in hot water was added to grafted SiO<sub>2</sub> nanoparticles to remove the triethylamine. After

removing the water, the product was dialyzed with a cellulose acetate (supplier, Aldrich) for several days in water to remove any remaining free organosilane. Finally, MP-TsOH (macroporous polystyrene sulfonic acid) columns (Symta) were used to remove any remaining triethylamine of dialyzed SiO<sub>2</sub> nanoparticles. SiO<sub>2</sub> nanoparticles functionalized with Na salt (SiO<sub>2</sub>-anion) were obtained after distillation of the solvent. <sup>13</sup>C NMR (solid state): δ 14.03, 28.94, 127.44, 141.26, 145.77. <sup>19</sup>F NMR: δ -78.35 ppm(s).

### Synthesis of nanoparticles grafted with PEG and the anion of sodium 2-[(Trifluoromethane-sulfonylimido)-N-4-sulfonylphenyl]-ethyl trimethoxysilane (SiO<sub>2</sub>-PEG-anion).

First, organosilane 2 was synthesized by experimental conditions explained above<sup>1</sup>. Second, an alkaline stabilized dispersion of silica nanoparticles was diluted to 4 wt% particle fraction by addition of aqueous sodium hydroxide solution to pH ~11. [Methoxy(polyethyleneoxy)propyl] trimethoxysilane (0.75 g, Mw ~ 470, Specific Polymers<sup>®</sup>) and triethylammonium 2-[(Trifluoromethane-sulfonylimido)-N-4-sulfonylphenyl]ethyl-trimethoxysilane (0.75 g, organosilane 3) were added to 1.0 g commercial SiO<sub>2</sub> nanoparticles dropwise at 100°C. Following the reaction solution was heated for 12 hours at 100°C. After 24 hours, an excess of Na<sub>2</sub>CO<sub>3</sub> in hot water was added to SiO<sub>2</sub> nanoparticles functionalized to remove the triethylamine. After removing the water, the product was dialyzed for several days in water to remove any remaining free organosilane. Finally, SiO<sub>2</sub> nanoparticles functionalized with polymer and anion were obtained after distillation of the solvent. <sup>13</sup>C NMR (solid state): δ 7.18, 12.57, 20.78, 26.67, 56.59, 67.75, 124.38, 125.63, 140.40, 144.34. <sup>19</sup>F NMR: δ -78.25 ppm(s).

### Synthesis of new polymer/SiO<sub>2</sub> nanohybrid electrolytes.

A dispersion of SiO<sub>2</sub> nanoparticles functionalized with the anion of Na salt and/or PEG was prepared in methanol and water. The dispersion of grafted SiO<sub>2</sub> nanoparticles was added to a mixture of polyethylene glycol dimethyl ether (PEGDME, 0.050g, M<sub>w</sub> ~ 250) and polyethylene oxide (PEO, 0.050g, M<sub>w</sub> ~ 5x10<sup>6</sup>) at ratio 1:1 in weight. After mixing, samples were dried in the convection oven at 80°C overnight and for at least 24 hours under vacuum.

| Polymer electrolytes                         | PEO/PEGDME |     |
|----------------------------------------------|------------|-----|
|                                              | (w/w)      |     |
| EP-SiO <sub>2</sub> -anion (EO/Na ~ 40)      |            | 40  |
| EP-SiO <sub>2</sub> -anion (EO/Na ~ 20)      | 1 : 1      | 20  |
| EP-SiO <sub>2</sub> -anion (EO/Na ~ 10)      |            | 10  |
| EP-SiO <sub>2</sub> -anion (EO/Na ~ 6.5)     |            | 6.5 |
| EP-SiO <sub>2</sub> -PEG-anion (EO/Na ~ 40)  |            | 40  |
| EP-SiO <sub>2</sub> -PEG-anion (EO/Na ~ 20)  | 1 : 1      | 20  |
| EP-SiO <sub>2</sub> -PEG-anion (EO/Na ~ 10)  |            | 10  |
| EP-SiO <sub>2</sub> -PEG-anion (EO/Na ~ 6.5) |            | 6.5 |

**Table S1.** Composition of the polymer electrolytes.

### Electrochemical measurements.

The ionic conductivity measurements of the polymer electrolytes were carried out by AC impedance spectroscopic technique using a Solartron 1260 over the frequency range from 1Hz to 1MHz with a signal level of 10 mV. The conductivity measurements of polymer electrolytes were carried out by sandwiching the samples between two stainless-steel (SS) electrodes. The temperature dependence of the ionic conductivity was performed in a temperature range from 25 to 80 °C. The electrochemical window of the polymer electrolytes was evaluated at 1mV/s scan rate and room temperature by cyclic voltammetry. For these measurements, the polymer electrolytes were sandwiched between two stainless-steel (SS) electrodes in a Swagelock<sup>®</sup> cell.

a

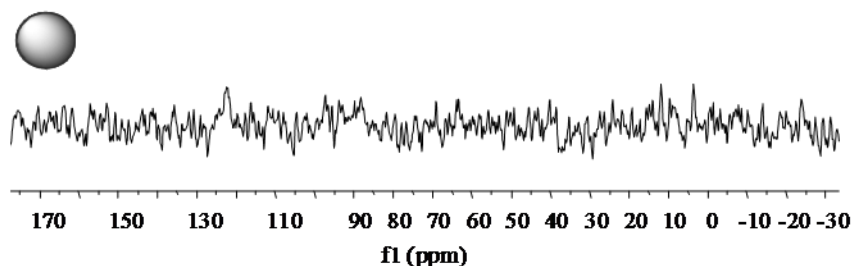

b

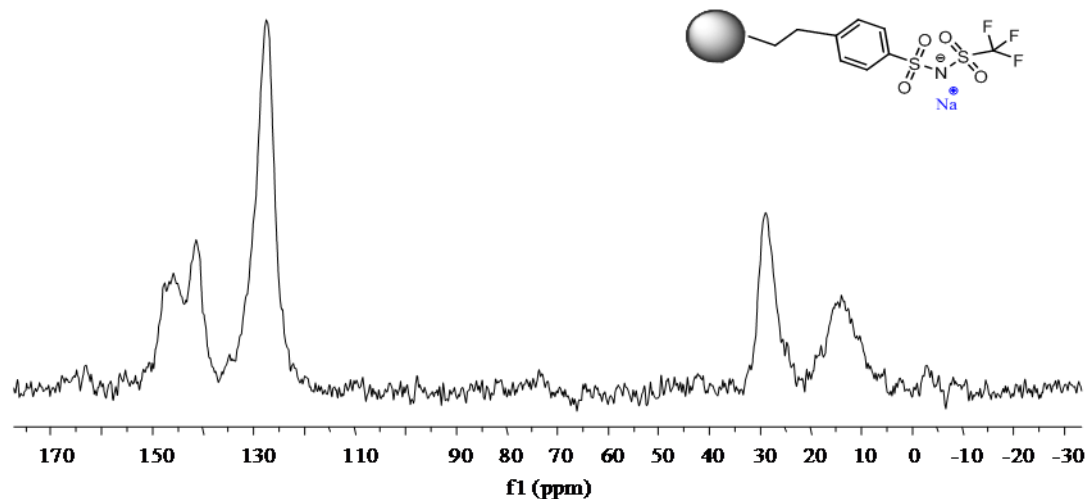

c

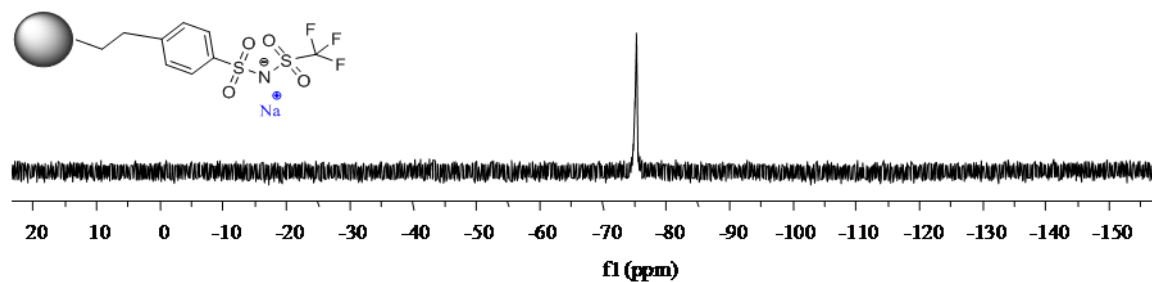

d

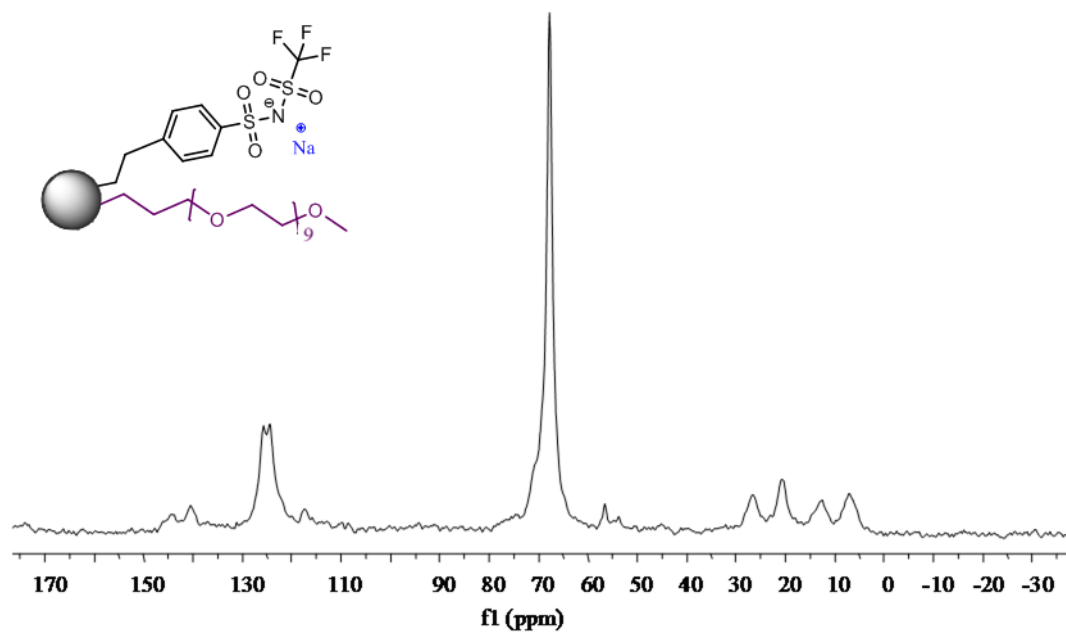

e

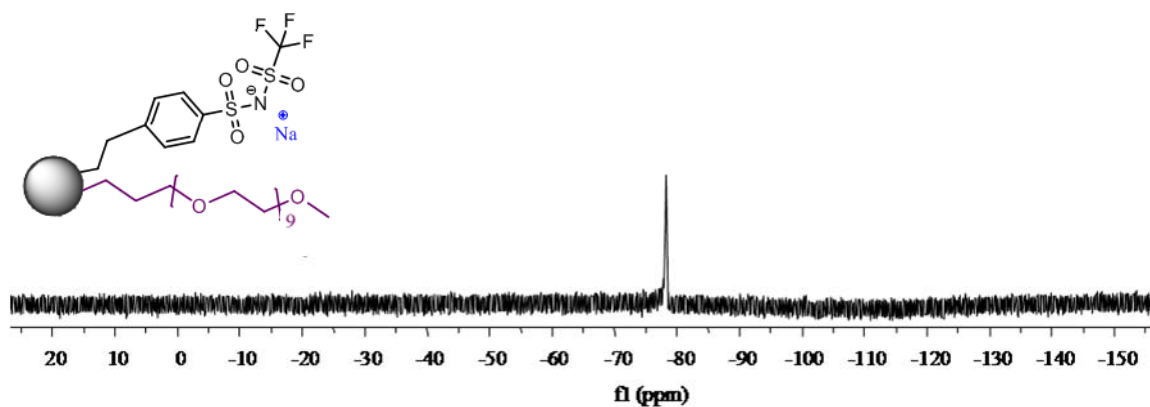

**Fig. S1.** <sup>13</sup>C NMR and <sup>19</sup>F NMR spectra of all SiO<sub>2</sub> nanoparticles. a) <sup>13</sup>C NMR Spectra for commercial SiO<sub>2</sub> nanoparticles. b) <sup>13</sup>C NMR Spectra for SiO<sub>2</sub>-anion nanoparticles. c) <sup>19</sup>F NMR Spectra for SiO<sub>2</sub>-anion nanoparticles. d) <sup>13</sup>C NMR Spectra for SiO<sub>2</sub>-PEG-anion nanoparticles. e) <sup>19</sup>F NMR Spectra for SiO<sub>2</sub>-PEG-anion nanoparticles.

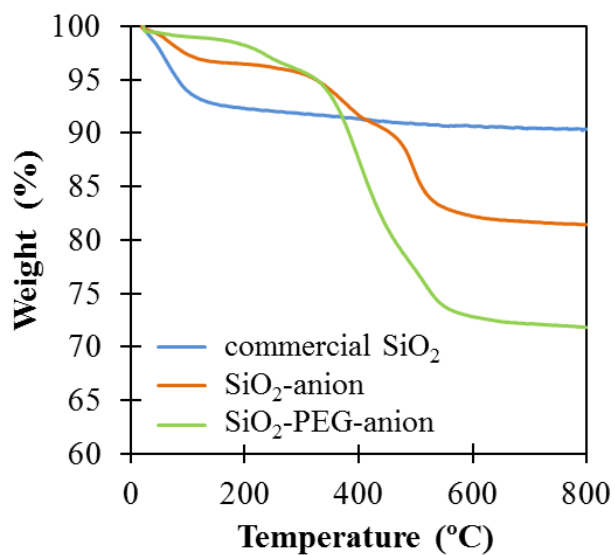

**Fig. S2.** TGAs of all SiO<sub>2</sub> nanoparticles.

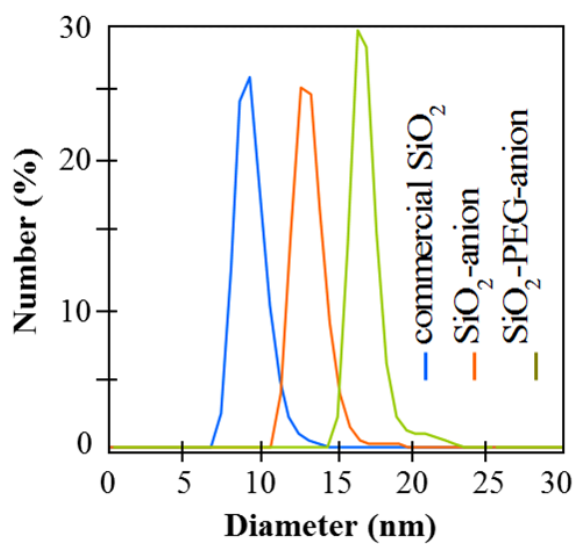

**Fig. S3.** DLS measurements of commercial SiO<sub>2</sub> nanoparticles, SiO<sub>2</sub>-anion and SiO<sub>2</sub>-PEG-anion.

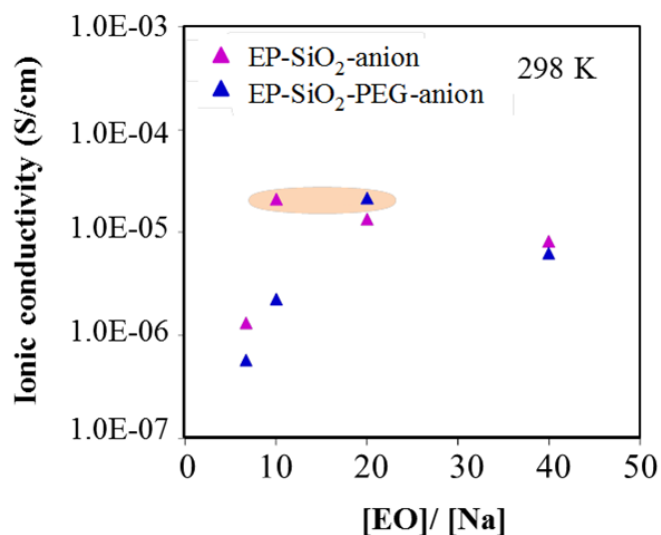

**Fig. S4.** Ionic conductivities of EP-SiO<sub>2</sub>-anion and EP-SiO<sub>2</sub>-PEG-anion electrolytes at room temperature, which has the highest Na concentration of the series were studied in this research.

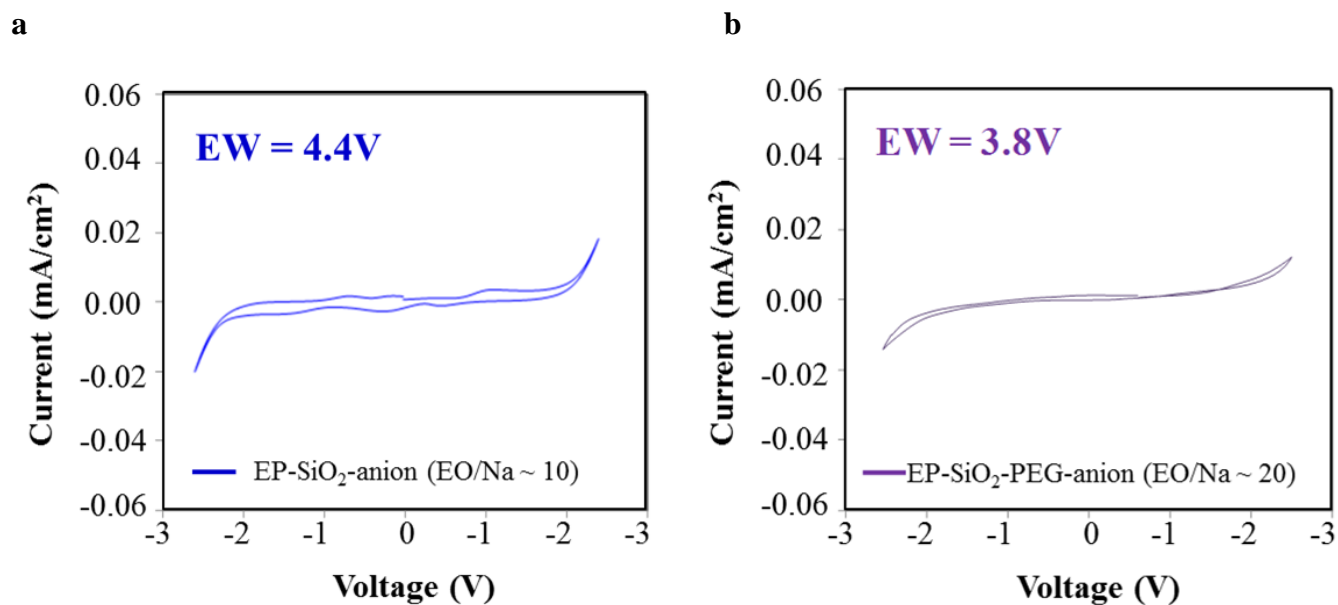

**Fig. S5.** The electrochemical windows of the two polymer electrolytes, a) EP-SiO<sub>2</sub>-anion (EO/Na ~ 10) and b) EP-SiO<sub>2</sub>-PEG-anion (EO/Na ~ 20), with highest ionic conductivity.

Reference:

1 A. El Kadib, P. Hesemann, K. Molvinger, J. Brandner, C. Biolley, P. Gaveau, J.J.E. Moreau, D. Brunel, *J. Am. Chem. Soc.*, 2009, **131**, 2882.
